# Supplementary material for: Is sexual reproduction of high-mountain plants endangered by heat?
Source: PubMed Central journal article supplement (PMC4363489; doi:10.1007/s00442-015-3247-0), 2015-02-20
Supplement: 442_2015_3247_MOESM1_ESM.pdf [file 442_2015_3247_MOESM1_ESM.pdf]

## **Is sexual reproduction of high-mountain plants endangered by heat?**

Ursula Ladinig, Manuel Pramsohler, Ines Bauer, Sonja Zimmermann, Gilbert Neuner, Johanna Wagner  
Institute of Botany, Faculty of Biology, University of Innsbruck,  
Sternwartestraße 15, A 6020 Innsbruck, Austria

Corresponding author: [johanna.wagner@uibk.ac.at](mailto:johanna.wagner@uibk.ac.at)

**Table S1.** Heat tolerance (LT<sub>50</sub>) of whole vegetative and reproductive shoots and individual reproductive structures of the investigated alpine plant species at different stages of reproductive development (bud stages *b1*, *b2*; *a* anthesis; *f* early fruit development).

|                                 |              | Visual assessment of whole shoots |               | TTC-assessment of reproductive structures |                 |                 |                 |                |
|---------------------------------|--------------|-----------------------------------|---------------|-------------------------------------------|-----------------|-----------------|-----------------|----------------|
|                                 |              | vegetative                        | reproductive  | pedicel                                   | petals          | ovary           | style           | pollen         |
| <i>Calluna vulgaris</i>         | <i>b2 ns</i> | 50.1 ± 1.0 A                      | 49.1 ± 1.7 A  | 51.5 ± 1.7 a                              | -               | 51.6 ± 2.0 a    | 49.2 ± 2.8 a A  | -              |
|                                 | <i>a ns</i>  | 50.5 ± 0.9 AB                     | 49.6 ± 1.3 A  | -                                         | -               | -               | 49.8 ± 2.2 A    | -              |
|                                 | <i>f**</i>   | 51.3 ± 0.9 B                      | 48.9 ± 1.3 A  | -                                         | -               | -               | -               | -              |
| <i>Loiseleuria procumbens</i>   | <i>b2***</i> | 49.7 ± 0.7 A                      | 48.1 ± 0.9 A  | 48.5 ± 0.8 a A                            | 48.0 ± 0.0 a A  | 47.8 ± 0.8 a A  | 47.8 ± 0.8 a A  | 51.4 ± 1.7 b   |
|                                 | <i>a***</i>  | 51.1 ± 0.5 B                      | 48.1 ± 0.7 A  | 49.1 ± 1.3 a A                            | 48.9 ± 1.0 a B  | 48.6 ± 1.6 a A  | 48.8 ± 1.5 a A  | -              |
|                                 | <i>f**</i>   | 52.3 ± 0.9 C                      | 49.9 ± 1.0 B  | 50.5 ± 1.4 a A                            | -               | 49.4 ± 1.3 a B  | -               | -              |
| <i>Rhododendron ferrugineum</i> | <i>b1***</i> | 47.7 ± 0.5 A                      | 44.0 ± 1.5 A  | 48.6 ± 1.3 b A                            | 44.8 ± 0.4 a A  | 47.8 ± 2.9 b A  | 48.3 ± 2.1 b B  | 50.1 ± 1.2 b A |
|                                 | <i>b2***</i> | 49.5 ± 0.8 B                      | 44.9 ± 1.3 AB | 48.1 ± 2.0 bc A                           | 44.8 ± 0.4 a A  | 46.8 ± 1.8 ab A | 47.0 ± 1.6 ab A | 50.0 ± 1.1 c A |
|                                 | <i>a***</i>  | 50.2 ± 0.6 B                      | 43.6 ± 1.3 A  | 48.6 ± 0.8 bc A                           | 44.8 ± 1.6 a A  | 47.1 ± 1.7 b A  | 49.8 ± 1.0 c C  | 53.0           |
|                                 | <i>f*</i>    | 49.3 ± 0.6 B                      | 46.6 ± 1.1 B  | -                                         | -               | 46.8 ± 1.8 A    | -               | -              |
| <i>Saxifraga bryoides</i>       | <i>b1***</i> | 49.7 ± 0.8 A                      | 46.6 ± 1.3 A  | -                                         | 46.4 ± 1.0 a B  | 48.2 ± 4.7 a A  | 48.2 ± 4.7 a A  | 47.8 ± 4.1 a A |
|                                 | <i>b2***</i> | 50.0 ± 0.7 A                      | 45.9 ± 1.4 A  | 46.5 ± 2.6 a A                            | 45.2 ± 0.4 a A  | 45.8 ± 2.3 a B  | 47.5 ± 2.6 a A  | 46.9 ± 1.8 a A |
|                                 | <i>a***</i>  | 49.6 ± 0.5 A                      | 46.3 ± 1.5 A  | 49.4 ± 1.0 b B                            | 45.7 ± 1.3 a AB | 48.4 ± 1.6 b A  | 48.0 ± 1.0 b A  | -              |
|                                 | <i>f***</i>  | 50.0 ± 1.6 A                      | 47.0 ± 2.1 A  | 48.7 ± 1.5 a B                            | -               | 47.8 ± 2.4 a A  | -               | -              |
| <i>Saxifraga caesia</i>         | <i>b1**</i>  | 48.7 ± 0.4 A                      | 47.9 ± 1.0 B  | -                                         | -               | 47.3 ± 1.8 a B  | -               | 49.4 ± 1.5 b A |
|                                 | <i>b2***</i> | 48.9 ± 0.9 AB                     | 45.5 ± 1.6 A  | 45.2 ± 2.0 ab A                           | 44.2 ± 1.0 a A  | 45.4 ± 2.1 ab A | 45.6 ± 1.0 ab A | 48.1 ± 5.0 b A |
|                                 | <i>a***</i>  | 49.7 ± 0.5 B                      | 45.1 ± 1.7 A  | 45.6 ± 1.9 ab A                           | 45.4 ± 1.8 a A  | 47.3 ± 1.2 bc B | 47.3 ± 0.9 bc B | 58.8           |
|                                 | <i>f***</i>  | 49.0 ± 1.2 AB                     | 45.9 ± 1.8 A  | 47.0 ± 2.8 a A                            | -               | 48.3 ± 1.9 a B  | -               | -              |
| <i>Saxifraga moschata</i>       | <i>b1**</i>  | 48.3 ± 0.9 A                      | 47.2 ± 1.4 A  | -                                         | 47.3 ± 1.5 a B  | 47.6 ± 1.2 a A  | -               | 48.2 ± 3.2 a A |
|                                 | <i>b2**</i>  | 48.5 ± 1.2 A                      | 47.3 ± 1.3 A  | 47.9 ± 1.1 a A                            | 47.4 ± 0.8 a B  | 47.8 ± 0.9 a A  | 47.8 ± 1.0 a A  | 50.3 ± 2.3 b A |
|                                 | <i>a**</i>   | 48.7 ± 1.1 A                      | 46.0 ± 2.6 B  | 48.3 ± 1.9 b A                            | 44.3 ± 2.7 a A  | 48.6 ± 1.5 b A  | 47.3 ± 1.7 b A  | 75.0           |
|                                 | <i>fns</i>   | 49.1 ± 0.8 A                      | 48.0 ± 1.8 A  | 48.5 ± 0.5 a A                            | -               | 47.9 ± 2.0 a A  | -               | -              |
| <i>Saxifraga oppositifolia</i>  | <i>b2</i>    | > 52.0                            | 50.8 ± 2.7 A  | 52.5 ± 2.2 a B                            | 52.2 ± 2.3 a B  | 51.8 ± 2.3 a A  | 51.7 ± 2.5 a A  | 54.5 ± 1.4 a A |
|                                 | <i>a</i>     | > 52.0                            | 48.8 ± 2.4 A  | 49.0 ± 2.7 a A                            | 48.8 ± 2.8 a A  | 49.6 ± 2.8 a A  | 50.2 ± 4.0 a A  | > 55.0         |
|                                 | <i>f</i>     | > 52.0                            | 51.0 ± 0.0 A  | 52.1 ± 1.8 a B                            | -               | 51.4 ± 1.8 a A  | -               | -              |
| <i>Silene acaulis</i>           | <i>b1***</i> | 52.2 ± 0.1 B                      | 49.5 ± 2.4 A  | -                                         | 48.5 ± 3.5 a A  | 48.3 ± 3.2 a A  | 48.2 ± 2.9 a A  | 48.5 ± 3.0 a A |
|                                 | <i>b2***</i> | 50.9 ± 1.2 A                      | 48.4 ± 2.7 A  | 49.3 ± 1.6 ab A                           | 46.2 ± 2.0 a A  | 49.4 ± 2.8 ab A | 48.5 ± 1.5 ab A | 50.6 ± 2.3 A   |
|                                 | <i>a***</i>  | 50.9 ± 1.4 A                      | 47.9 ± 2.3 A  | 49.3 ± 1.9 a A                            | 48.0 ± 1.2 a A  | 49.9 ± 2.0 a A  | 49.0 ± 2.1 a A  | -              |
|                                 | <i>f***</i>  | 51.0 ± 0.0 A                      | 48.9 ± 1.3 A  | 48.3 ± 0.9 a A                            | -               | 49.8 ± 1.7 b A  | -               | -              |
| <i>Cerastium uniflorum</i>      | <i>b2***</i> | 49.1 ± 0.5 A                      | 45.6 ± 0.3 A  | 47.7 ± 1.6 b A                            | 45.8 ± 3.0 a A  | 47.9 ± 2.4 b A  | 46.6 ± 2.1 a A  | 43.9 ± 1.3 a   |
|                                 | <i>a***</i>  | 48.9 ± 1.0 A                      | 45.2 ± 0.4 A  | 48.6 ± 1.8 b A                            | 45.1 ± 2.3 a A  | 48.2 ± 1.5 b A  | 46.4 ± 2.6 a A  | 45.0           |
|                                 | <i>fns</i>   | 49.5 ± 0.5 A                      | 48.4 ± 0.2 B  | 48.6 ± 1.7 a A                            | -               | 48.5 ± 2.3 a A  | -               | -              |
| <i>Ranunculus glacialis</i>     | <i>b2*</i>   | 45.9 ± 0.3 B                      | 45.0 ± 1.4 A  | 46.0 ± 1.4 a A                            | 45.5 ± 1.1 a A  | 46.3 ± 2.4 a A  | 45.7 ± 2.1 a A  | 44.7 ± 1.2 a   |
|                                 | <i>a***</i>  | 46.6 ± 0.4 C                      | 45.6 ± 1.0 A  | 46.0 ± 0.0 a A                            | 46.1 ± 0.9 a A  | 45.7 ± 0.5 a A  | 45.6 ± 0.7 a A  | 50.0           |
|                                 | <i>fns</i>   | 45.0 ± 0.8 A                      | 44.9 ± 1.1 A  | 45.2 ± 1.6 a A                            | -               | 45.1 ± 1.4 a A  | -               | -              |

Significant differences between vegetative and reproductive shoots within the same developmental stage are indicated by \* ( $P \leq 0,05$ ), \*\* ( $P \leq 0,01$ ), \*\*\* ( $P \leq 0,001$ ), *ns* – not significant; *t*-test. Different capital letters indicate significant differences ( $P \leq 0.05$ ) within whole shoots or the same reproductive structure of a species during different stages of reproductive development, different lower case letters indicate significant differences among mean values of different reproductive structures within a species during the same developmental stage; one-way ANOVA. - not determined or not assignable. LT<sub>50</sub> values for mature pollen (stage *a*) in italics refer to germinability

**Table S2.** Heat tolerance (LT<sub>10</sub>) of whole vegetative and reproductive shoots and individual reproductive structures of the investigated alpine plant species at different stages of reproductive development (bud stages *b1*, *b2*; *a* anthesis; *f* early fruit development).

|                                 |              | Visual assessment of whole shoots |               | TTC-assessment of reproductive structures |                |                  |                 |                |
|---------------------------------|--------------|-----------------------------------|---------------|-------------------------------------------|----------------|------------------|-----------------|----------------|
|                                 |              | vegetative                        | reproductive  | pedicel                                   | petals         | ovary            | style           | pollen         |
| <i>Calluna vulgaris</i>         | <i>b2 ns</i> | 48.5 ± 1.1 A                      | 47.3 ± 1.0 A  | 50.6 ± 1.6 a                              | -              | 50.4 ± 1.8 a     | 48.4 ± 2.8 a A  | -              |
|                                 | <i>a ns</i>  | 49.6 ± 0.7 A                      | 48.3 ± 1.8 A  | -                                         | -              | -                | 48.9 ± 1.9 A    | -              |
|                                 | <i>f*</i>    | 49.3 ± 1.0 A                      | 48.2 ± 1.0 A  | -                                         | -              | -                | -               | -              |
| <i>Loiseleuria procumbens</i>   | <i>b2*</i>   | 47.6 ± 1.0 A                      | 47.3 ± 1.0 A  | 46.7 ± 1.4 b A                            | 46.1 ± 0.0 b A | 45.7 ± 1.0 b A   | 45.8 ± 1.1 b A  | 49.4 ± 1.3 a   |
|                                 | <i>a***</i>  | 49.2 ± 1.1 B                      | 46.1 ± 1.5 B  | 48.1 ± 1.9 a AB                           | 47.4 ± 1.9 a A | 47.5 ± 2.3 a A   | 47.7 ± 2.2 a A  | -              |
|                                 | <i>f ns</i>  | 50.6 ± 1.8 B                      | 48.4 ± 2.3 AB | 48.7 ± 1.4 a B                            | -              | 46.6 ± 2.3 a A   | -               | -              |
| <i>Rhododendron ferrugineum</i> | <i>b1**</i>  | 45.4 ± 1.8 A                      | 43.6 ± 1.3 AB | 46.4 ± 1.2 b A                            | 42.7 ± 0.1 c A | 45.8 ± 3.5 abc A | 45.2 ± 2.6 b A  | 48.3 ± 1.9 a A |
|                                 | <i>b2***</i> | 47.9 ± 1.0 AB                     | 44.4 ± 1.3 AB | 45.4 ± 2.9 b A                            | 42.7 ± 0.1 c A | 44.7 ± 1.8 bc A  | 45.0 ± 1.7 b A  | 48.1 ± 1.8 a A |
|                                 | <i>a***</i>  | 48.6 ± 1.6 B                      | 42.8 ± 1.3 A  | 46.2 ± 0.2 a A                            | 43.3 ± 1.8 b A | 44.5 ± 1.4 b A   | 47.7 ± 1.8 a B  | -              |
|                                 | <i>f*</i>    | 48.2 ± 0.9 B                      | 45.2 ± 1.5 B  | -                                         | -              | 43.2 ± 2.6 A     | -               | -              |
| <i>Saxifraga bryoides</i>       | <i>b1***</i> | 48.9 ± 1.0 AB                     | 46.0 ± 1.8 A  | -                                         | 43.8 ± 1.6 a A | 44.8 ± 5.2 a A   | 44.8 ± 5.3 a A  | 44.4 ± 5.3 a A |
|                                 | <i>b2***</i> | 49.3 ± 0.8 B                      | 45.4 ± 0.8 AB | 44.9 ± 1.9 a A                            | 44.1 ± 0.0 a A | 44.4 ± 1.7 a A   | 45.7 ± 2.2 a A  | 44.8 ± 1.7 a A |
|                                 | <i>a***</i>  | 48.2 ± 0.4 A                      | 44.9 ± 1.4 B  | 48.2 ± 1.2 a B                            | 44.6 ± 1.3 b A | 47.0 ± 2.0 a A   | 46.3 ± 1.5 b A  | -              |
|                                 | <i>f***</i>  | 48.6 ± 1.8 AB                     | 46.0 ± 1.3 A  | 47.4 ± 2.0 a B                            | -              | 45.4 ± 3.8 a A   | -               | -              |
| <i>Saxifraga caesia</i>         | <i>b1 ns</i> | 47.1 ± 0.4 A                      | 47.1 ± 0.9 A  | -                                         | -              | 45.3 ± 1.2 b A   | -               | 48.7 ± 1.7 a A |
|                                 | <i>b2***</i> | 47.2 ± 0.9 A                      | 44.7 ± 0.9 B  | 44.6 ± 2.4 a A                            | 43.7 ± 0.8 a A | 43.1 ± 1.5 a B   | 44.0 ± 1.4 a A  | 46.0 ± 4.8 a A |
|                                 | <i>a***</i>  | 48.7 ± 0.7 B                      | 44.4 ± 1.7 B  | 44.6 ± 2.4 a A                            | 44.3 ± 2.2 a A | 45.9 ± 1.5 a A   | 45.8 ± 1.4 a B  | -              |
|                                 | <i>f**</i>   | 47.6 ± 1.7 A                      | 45.5 ± 2.0 AB | 46.6 ± 3.1 a A                            | -              | 47.1 ± 3.2 a A   | -               | -              |
| <i>Saxifraga moschata</i>       | <i>b1*</i>   | 47.5 ± 1.0 A                      | 46.3 ± 1.8 A  | -                                         | 45.2 ± 2.3 a A | 45.7 ± 1.0 a A   | -               | 46.2 ± 4.6 a A |
|                                 | <i>b2**</i>  | 47.5 ± 1.1 A                      | 46.8 ± 1.3 A  | 47.1 ± 1.5 b A                            | 46.4 ± 1.2 b A | 46.1 ± 1.4 b A   | 47.0 ± 1.5 b A  | 49.8 ± 2.5 a B |
|                                 | <i>a***</i>  | 47.9 ± 0.9 A                      | 45.0 ± 2.1 B  | 46.8 ± 2.6 a A                            | 43.9 ± 2.6 b A | 47.1 ± 2.0 a A   | 46.4 ± 1.9 a A  | -              |
|                                 | <i>f***</i>  | 47.9 ± 1.2 A                      | 45.8 ± 1.1 AB | 46.6 ± 0.3 a A                            | -              | 46.4 ± 2.3 a A   | -               | -              |
| <i>Saxifraga oppositifolia</i>  | <i>b2</i>    | -                                 | 49.7 ± 2.7 AB | 50.3 ± 2.7 a A                            | 50.1 ± 2.6 a A | 48.9 ± 3.8 a A   | 49.2 ± 3.2 a A  | 51.2 ± 2.5 a A |
|                                 | <i>a</i>     | -                                 | 47.6 ± 1.7 A  | 47.5 ± 2.8 b B                            | 47.2 ± 2.4 b B | 48.3 ± 2.8 b A   | 48.3 ± 3.3 b A  | 52.0 ± 0.0 a A |
|                                 | <i>f</i>     | -                                 | 50.9 ± 0.0 B  | 50.1 ± 1.5 a AB                           | -              | 49.4 ± 1.0 a A   | -               | -              |
| <i>Silene acaulis</i>           | <i>b1***</i> | 50.3 ± 0.2 A                      | 48.0 ± 3.0 A  | -                                         | 46.9 ± 4.0 a A | 46.8 ± 3.0 a A   | 46.5 ± 2.9 a A  | 46.1 ± 3.8 a A |
|                                 | <i>b2**</i>  | 49.7 ± 0.6 B                      | 47.6 ± 2.6 A  | 48.4 ± 1.9 ab A                           | 44.6 ± 2.2 c A | 47.6 ± 2.7 ab A  | 46.9 ± 1.9 b A  | 48.4 ± 2.2 a A |
|                                 | <i>a***</i>  | 49.4 ± 1.2 B                      | 46.5 ± 2.2 B  | 47.9 ± 1.5 a A                            | 46.3 ± 1.4 b A | 48.2 ± 2.5 a A   | 47.4 ± 1.7 ab A | -              |
|                                 | <i>f***</i>  | 50.3 ± 0.0 A                      | 47.0 ± 1.6 AB | 47.2 ± 0.8 a A                            | -              | 48.9 ± 2.1 b A   | -               | -              |
| <i>Cerastium uniflorum</i>      | <i>b2***</i> | 48.4 ± 0.7 A                      | 43.3 ± 0.4 A  | 45.8 ± 1.7 a A                            | 43.8 ± 3.0 a A | 45.4 ± 2.7 a A   | 44.2 ± 2.5 a A  | 42.8 ± 0.8 a   |
|                                 | <i>a***</i>  | 47.7 ± 0.9 A                      | 43.9 ± 2.3 A  | 46.2 ± 2.7 a A                            | 43.7 ± 2.2 a A | 45.5 ± 2.1 a A   | 44.5 ± 2.8 a A  | -              |
|                                 | <i>f*</i>    | 48.1 ± 0.1 A                      | 46.5 ± 1.3 A  | 46.7 ± 3.2 a A                            | -              | 46.5 ± 4.0 a A   | -               | -              |
| <i>Ranunculus glacialis</i>     | <i>b2 ns</i> | 44.3 ± 0.5 B                      | 44.4 ± 1.1 A  | 44.8 ± 1.7 c A                            | 44.9 ± 0.9 c A | 42.0 ± 2.3 b A   | 42.5 ± 2.1 b A  | 39.1 ± 1.2 a   |
|                                 | <i>a***</i>  | 46.2 ± 0.4 C                      | 44.9 ± 0.6 B  | 43.6 ± 0.0 a A                            | 45.7 ± 0.9 b B | 43.8 ± 1.0 a A   | 43.9 ± 1.4 a B  | -              |
|                                 | <i>f**</i>   | 43.7 ± 0.8 A                      | 44.2 ± 1.2 A  | 43.9 ± 1.6 a A                            | -              | 43.7 ± 0.8 a     | -               | -              |

Significant differences between vegetative and reproductive shoots within the same developmental stage are indicated by \* ( $P \leq 0,05$ ), \*\* ( $P \leq 0,01$ ), \*\*\* ( $P \leq 0,001$ ), *ns* – not significant; *t*-test. Different capital letters indicate significant differences ( $P \leq 0.05$ ) within whole shoots or the same reproductive structure of a species during different stages of reproductive development, different lower case letters indicate significant differences among mean values of different reproductive structures within a species during the same developmental stage; one-way ANOVA; - not determined or not assignable

Table S3. Results of a two-way fixed factor analysis of variance (GLM) of the effects “species” and “stage” (bud stage b1, b2, anthesis, fruiting), and their interaction on heat tolerance (LT<sub>50</sub>) of vegetative shoots. DF degrees of freedom, F variance ratio, P error probability.

| Source of variation    | DF  | F       | P       |
|------------------------|-----|---------|---------|
| species                | 8   | 129.656 | > 0.001 |
| stage                  | 3   | 6.423   | > 0.001 |
| species * stage        | 20  | 5.741   | > 0.001 |
| model                  | 31  | 38.149  | > 0.001 |
| error                  | 339 |         |         |
| R <sup>2</sup> = 0.777 |     |         |         |

Table S4. Results of a three-way fixed factor analysis of variance (GLM) of the effects “species”, “stage” (bud stage *b1*, *b2*, anthesis, fruiting) and reproductive “structure” (pedicel, petals, style, ovary), and their interactions on heat tolerance (LT<sub>50</sub>) of reproductive shoots. DF degrees of freedom, F variance ratio, P error probability.

| Source of variation         | DF   | F    | P       |
|-----------------------------|------|------|---------|
| species                     | 9    | 67.5 | > 0.001 |
| stage                       | 3    | 3.5  | 0.015   |
| structure                   | 3    | 21.7 | > 0.001 |
| species * stage             | 21   | 5.1  | > 0.001 |
| species * structure         | 26   | 3.3  | > 0.001 |
| stage * structure           | 7    | 1.3  | 0.269   |
| species * stage * structure | 36   | 1.2  | 0.172   |
| model                       | 105  | 10.0 | > 0.001 |
| error                       | 1082 |      |         |
| R <sup>2</sup> = 0.494      |      |      |         |
